# Supplementary material for: Lambda-PFLOTRAN 1.0: Workflow for Incorporating Organic Matter Chemistry Informed by Ultra High Resolution Mass Spectrometry into Biogeochemical Modeling
Source: Copernicus journal article supplement (doi:10.5194/gmd-2024-34), 2024-04-30
Supplement: Supplementary file 1 [file gmd-2024-34-supplement.pdf]

# 1 Supporting Information.

## 2 Lambda-PFLOTRAN 1.0: Workflow for Incorporating Organic 3 Matter Chemistry Informed by Ultra High Resolution Mass 4 Spectrometry into Biogeochemical Modeling

5  
6 Katherine A. Muller<sup>1</sup>, Peishi Jiang<sup>1</sup>, Glenn Hammond<sup>1</sup>, Tasneem Ahmadullah<sup>1</sup>, Hyun-Seob Song<sup>2</sup>, Ravi Kukkadapu<sup>1</sup>,  
7 Nicholas Ward<sup>3</sup>, Madison Bowe<sup>3</sup>, Rosalie K. Chu<sup>1</sup>, Qian Zhao<sup>1</sup>, Vanessa A. Garayburu-Caruso<sup>1</sup>, Alan Roebuck<sup>3</sup>,  
8 Xingyuan Chen<sup>1</sup>

9 <sup>1</sup> Pacific Northwest National Laboratory, Richland, WA 99352, USA

10 <sup>2</sup> Department of Biological Systems Engineering, University of Nebraska—Lincoln, Lincoln, Nebraska, USA

11 <sup>3</sup> Pacific Northwest National Laboratory, Sequim WA 98382, USA

12 Correspondence to: Katherine Muller ([katherine.muller@pnnl.gov](mailto:katherine.muller@pnnl.gov))

### 13 SI.1 Bulk Organic Matter (CH<sub>2</sub>O) Reaction Network

14 The reaction network developed for a generic organic matter molecule of CH<sub>2</sub>O is shown in Eq SI.1. This reaction network is used  
15 within the Lambda-PFLOTRAN workflow.

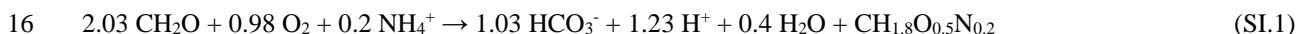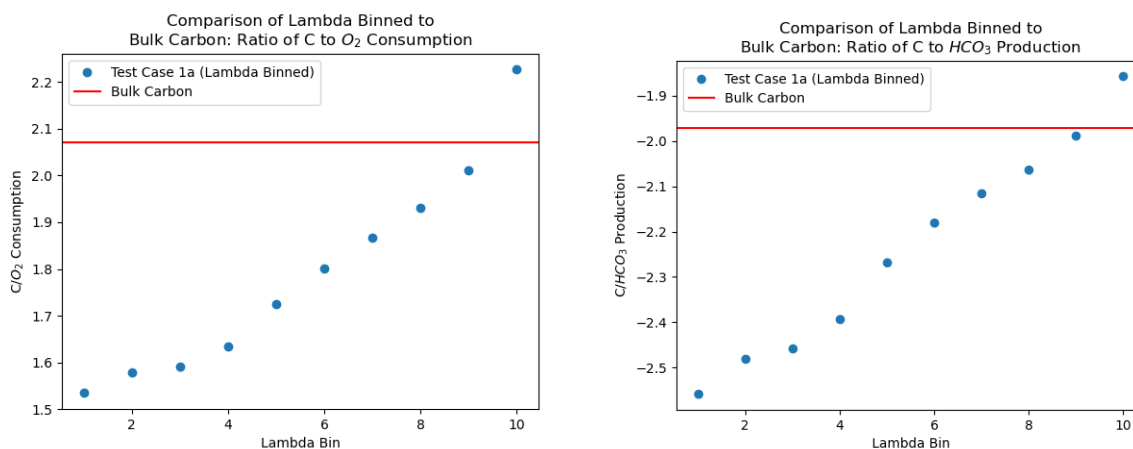

17  
18 **Figure S1.** Comparison of Lambda Binned Organic Matter to Bulk Organic Matter (left) Ratio of carbon to oxygen  
19 consumption; (right) Ratio of carbon to bicarbonate production.

20

21 **SI.2 Reaction Networks Developed for Test Case 1b and c**22 **Table S1. Reaction Network Developed from Lambda Theory for Test Case 1b**

| Bin Number | Representative Organic Matter Species Formula | $\lambda$ | $\lambda$ |               |              |                  |            |           |           |
|------------|-----------------------------------------------|-----------|-----------|---------------|--------------|------------------|------------|-----------|-----------|
|            |                                               |           | $y_{OC}$  | $y_{HCO_3^-}$ | $y_{NH_4^+}$ | $y_{HPO_4^{2-}}$ | $y_{HS^-}$ | $y_{H^+}$ | $y_{O_2}$ |
| 1          | $C_{32}H_{48}N_{0.24}O_{4.7}P_{0.54}S_{0.42}$ | 0.019     | -0.05     | 0.62          | -0.19        | 0.03             | 0.02       | 0.89      | -1.07     |
| 2          | $C_{27}H_{40}N_{0.16}O_{6.4}P_{0.57}S_{0.14}$ | 0.025     | -0.06     | 0.66          | -0.19        | 0.04             | 0.01       | 0.93      | -1.06     |
| 3          | $C_{23}H_{38}N_{0.15}O_{7.4}P_{0.53}S_{0.1}$  | 0.029     | -0.07     | 0.67          | -0.19        | 0.04             | 0.01       | 0.94      | -1.06     |
| 4          | $C_{21}H_{33}N_{0.17}O_{7.3}P_{0.45}S_{0.1}$  | 0.033     | -0.08     | 0.70          | -0.19        | 0.04             | 0.01       | 0.96      | -1.06     |
| 5          | $C_{20}H_{31}N_{0.36}O_{8.0}P_{0.35}S_{0.12}$ | 0.038     | -0.09     | 0.75          | -0.17        | 0.03             | 0.01       | 1.00      | -1.04     |
| 6          | $C_{19}H_{27}N_{0.35}O_8P_{0.24}S_{0.12}$     | 0.044     | -0.10     | 0.81          | -0.17        | 0.02             | 0.01       | 1.03      | -1.03     |
| 7          | $C_{17}H_{25}N_{0.44}O_{8.4}P_{0.2}S_{0.10}$  | 0.050     | -0.11     | 0.87          | -0.15        | 0.02             | 0.01       | 1.07      | -1.02     |
| 8          | $C_{16}H_{22}N_{0.64}O_{7.9}P_{0.14}S_{0.21}$ | 0.059     | -0.12     | 0.92          | -0.12        | 0.02             | 0.03       | 1.10      | -1.01     |
| 9          | $C_{13}H_{19}N_{0.93}O_{7.2}P_{0.12}S_{0.26}$ | 0.072     | -0.15     | 0.99          | -0.06        | 0.02             | 0.04       | 1.12      | -1.00     |
| 10         | $C_{11}H_{15}N_{0.17}O_{6.7}P_{0.08}S_{0.27}$ | 0.100     | -0.21     | 1.20          | 0.15         | 0.02             | 0.06       | 1.13      | -0.97     |

23

24

**Table S2: Reaction Network Developed from Lambda Theory for Test Case 1c**

| $\lambda$ Bin | Representative Organic Matter Species Formula | $\lambda$ | $\lambda$ |               |              |                  |            |           |           |
|---------------|-----------------------------------------------|-----------|-----------|---------------|--------------|------------------|------------|-----------|-----------|
|               |                                               |           | $y_{OC}$  | $y_{HCO_3^-}$ | $y_{NH_4^+}$ | $y_{HPO_4^{2-}}$ | $y_{HS^-}$ | $y_{H^+}$ | $y_{O_2}$ |
| 1             | $C_{31}H_{44}N_{0.33}O_{4.8}P_{0.64}S_{0.28}$ | 0.022     | -0.05     | 0.64          | -0.18        | 0.04             | 0.02       | 0.91      | -1.07     |
| 2             | $C_{26}H_{39}N_{0.20}O_{7.0}P_{0.57}S_{0.14}$ | 0.028     | -0.07     | 0.68          | -0.19        | 0.04             | 0.01       | 0.95      | -1.06     |
| 3             | $C_{22}H_{36}N_{0.24}O_{6.5}P_{0.49}S_{0.10}$ | 0.033     | -0.08     | 0.69          | -0.18        | 0.04             | 0.01       | 0.95      | -1.06     |
| 4             | $C_{20}H_{32}N_{0.28}O_{7.3}P_{0.43}S_{0.13}$ | 0.037     | -0.08     | 0.72          | -0.18        | 0.04             | 0.01       | 0.98      | -1.05     |
| 5             | $C_{19}H_{29}N_{0.48}O_{7.9}P_{0.3}S_{0.18}$  | 0.041     | -0.09     | 0.79          | -0.16        | 0.03             | 0.02       | 1.02      | -1.04     |
| 6             | $C_{18}H_{26}N_{0.68}O_{8.1}P_{0.23}S_{0.15}$ | 0.048     | -0.10     | 0.85          | -0.13        | 0.02             | 0.02       | 1.04      | -1.03     |
| 7             | $C_{17}H_{24}N_{0.69}O_{8.1}P_{0.18}S_{0.18}$ | 0.055     | -0.11     | 0.90          | -0.12        | 0.02             | 0.02       | 1.08      | -1.02     |
| 8             | $C_{15}H_{20}N_{0.67}O_{7.6}P_{0.16}S_{0.24}$ | 0.065     | -0.13     | 0.94          | -0.11        | 0.02             | 0.03       | 1.13      | -1.00     |
| 9             | $C_{13}H_{19}N_{1.13}O_{7.4}P_{0.10}S_{0.17}$ | 0.076     | -0.15     | 1.01          | -0.03        | 0.01             | 0.03       | 1.10      | -1.00     |
| 10            | $C_{10}H_{15}N_{1.56}O_{6.5}P_{0.06}S_{0.22}$ | 0.106     | -0.207    | 1.17          | 0.12         | 0.01             | 0.05       | 1.11      | -0.97     |

25

26

27

28

29 **SI.3 Test Case 1b and 1c Results**

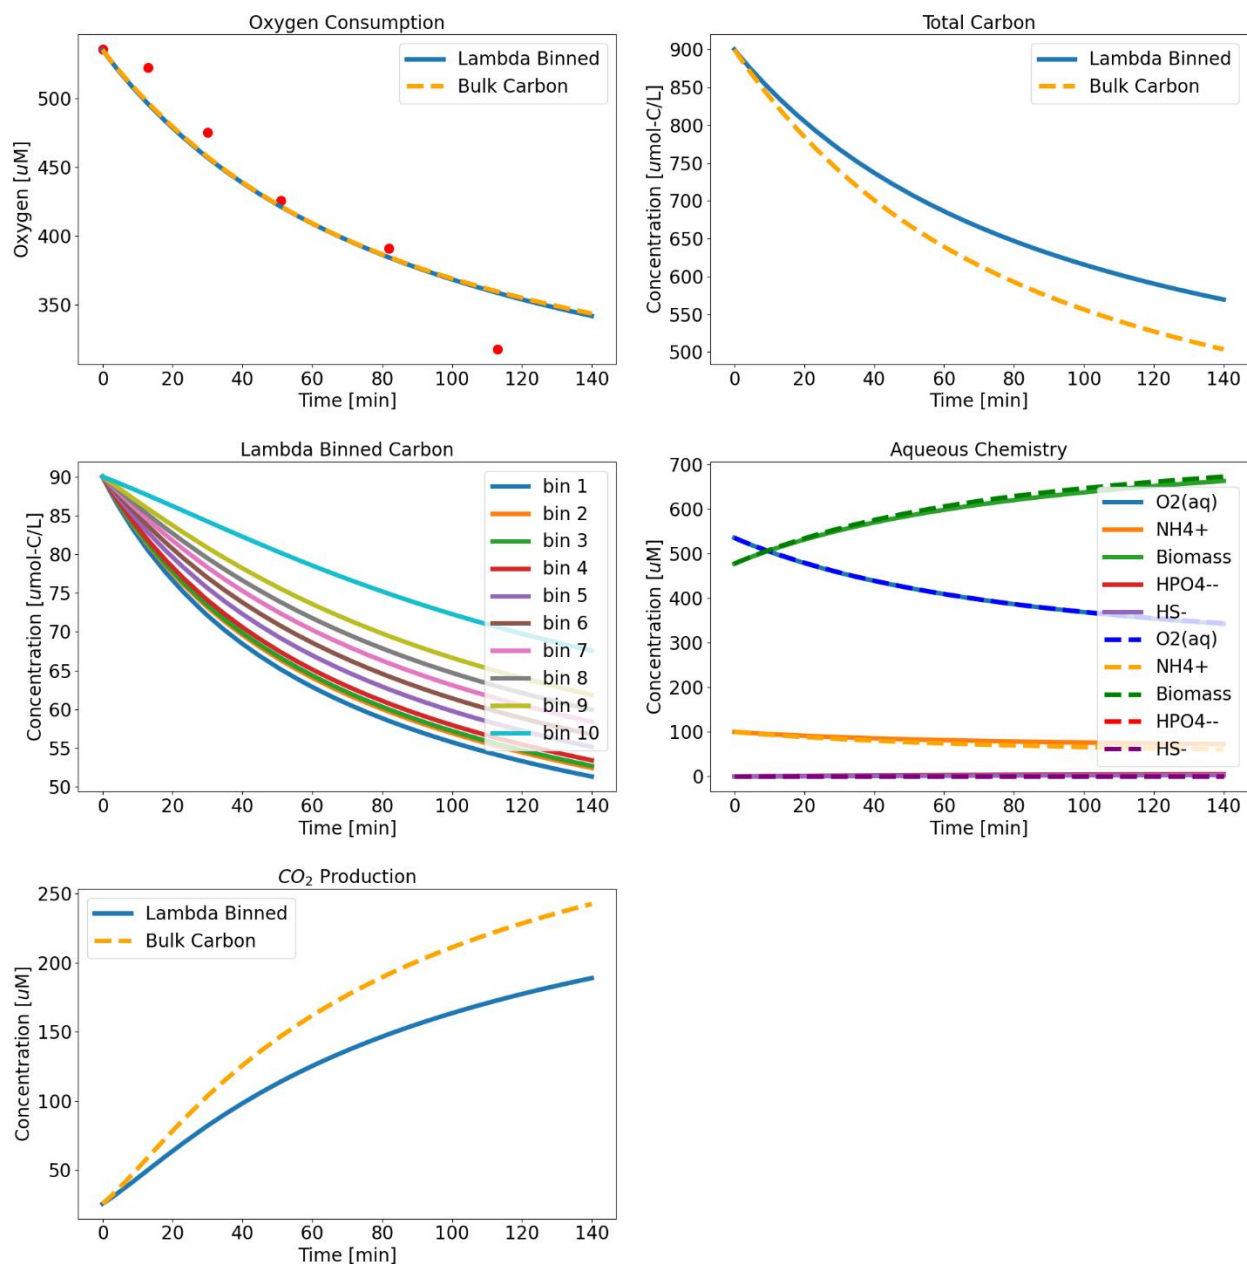

30  
 31 **Figure S2:** Test Case 1b Results – Oxygen Consumption (top left) where Lambda-PFLOTRAN workflow was used to fit (blue  
 32 line) to experimental respiration data (red dots) and the corresponding Total Carbon Consumption (top right); Individual OM  
 33 Consumption by  $\lambda$  bin (middle left); Corresponding biogeochemistry including O<sub>2</sub> (aq) (blue); Biomass (green); NH<sub>4</sub><sup>+</sup> (orange);  
 34 HS<sup>-</sup> (purple); and HPO<sub>4</sub><sup>2-</sup> (red) (middle right) and CO<sub>2</sub> production. The dashed orange lines show simulation results assuming a  
 35 generic OM species of CH<sub>2</sub>O for comparison. Fitted lambda  $\mu_{max} = 0.092 \text{ min}^{-1}$ ,  $V_h = 7.5 \text{ m}^3$ ;  $CC = 0.65 \text{ M}$  ( $R^2 = 0.88$ ). Fitted bulk  
 36 OM model values were  $0.19 \text{ min}^{-1}$ ,  $1.0 \text{ m}^3$ ,  $0.35 \text{ M}$  for  $\mu_{max}$ ,  $V_h$ ,  $CC$ , respectively ( $R^2 = 0.88$ ).  
 37

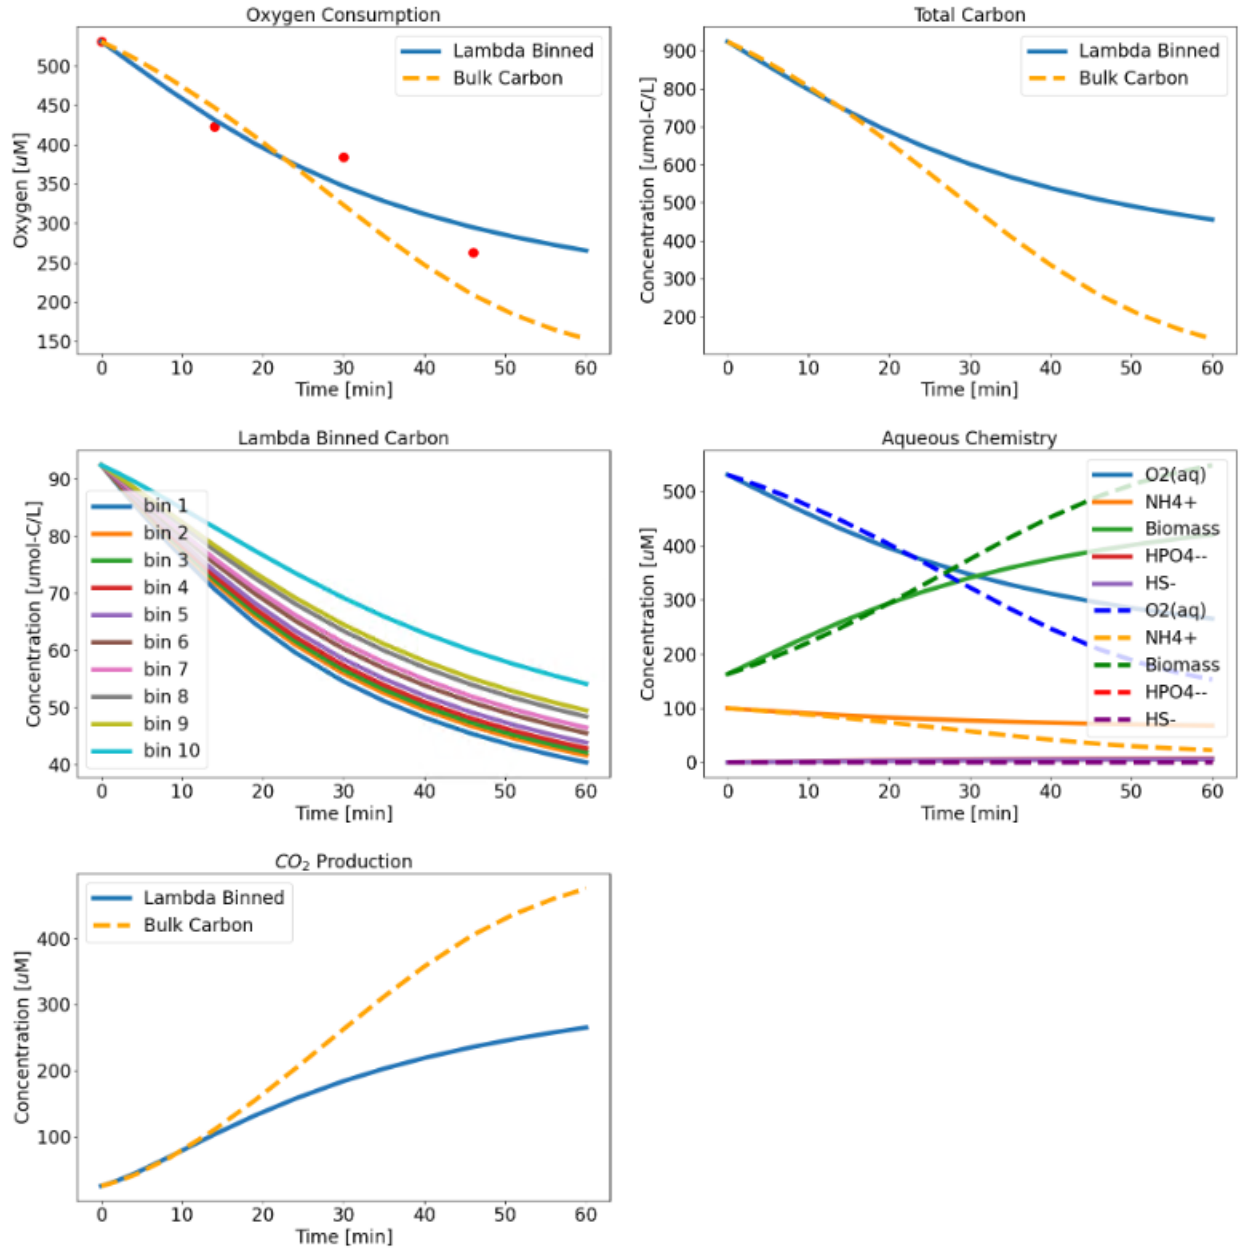

38  
 39 **Figure S3:** Test Case 1c Results – Oxygen Consumption (top left) where Lambda-PFLOTRAN workflow was used to fit (blue  
 40 line) to experimental respiration data (red dots) and the corresponding Total Carbon Consumption (top right); Individual OM  
 41 Consumption by  $\lambda$  bin (middle left); Corresponding biogeochemistry including O<sub>2</sub> (aq) (blue); Biomass (green); NH<sub>4</sub><sup>+</sup> (orange);  
 42 HS<sup>-</sup> (purple); and HPO<sub>4</sub><sup>-</sup> (red) (middle right); and CO<sub>2</sub> production (bottom left). The dashed orange lines show simulation results  
 43 assuming a generic OM species of CH<sub>2</sub>O for comparison. Fitted lambda  $\mu_{\max} = 0.33 \text{ min}^{-1}$ ,  $V_h = 10 \text{ m}^3$ ,  $CC = 0.27 \text{ M}$  ( $R^2 = 0.92$ ).  
 44 Fitted bulk OM model values were  $0.22 \text{ min}^{-1}$ ,  $10 \text{ m}^3$ ,  $0.47 \text{ M}$  for  $\mu_{\max}$ ,  $V_h$ , and  $CC$ , respectively ( $R^2 = 0.88$ ).
